# Supplementary material for: Molecular and biological characterization of a novel virus representing a novel genus of Alphaflexiviridae infecting different accessions of seashore paspalum, a turfgrass, widely grown in the United States
Source: Research Square preprint supplement (doi:10.21203/rs.3.rs-7610280/v1), 2025-09-25
Supplement: Supplementary file 1 [file a6410d8e59d05fe97da7cfa9.docx]

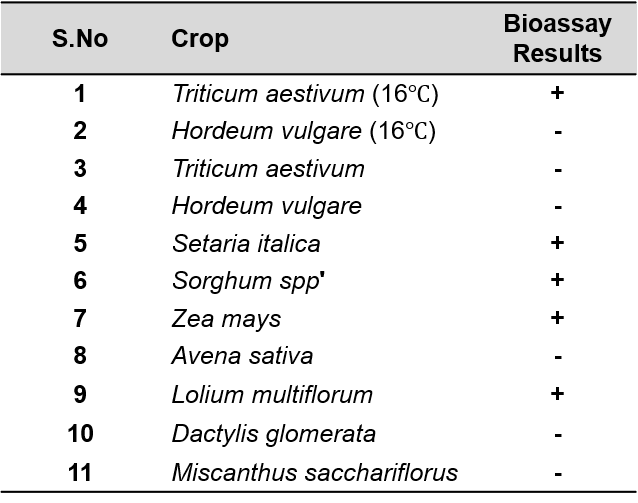


**Supplementary Table 1: Bioassay to check for PaLV infectivity in different plants species**

**+** presence of infection; **-** lack of infection

**Supplementary Table 2: Screening of Paspalum Germplasm to check for PaLV infection**

| **Sample** | **Name** | **Species (a)** | **From** | **PaLV PCR** | **Origin (a)** |
| --- | --- | --- | --- | --- | --- |
| 1 | PI 576140 | *P. distichum* | UGA | **+** | Brazil |
| 2 | PI 647922 | *P. distichum* | UGA | **-** | Australia |
| 3 | PI 403999 | *P. distichum* | UGA | **+** | Australia |
| 4 | Durban | *P. vaginatum* | UGA | **+** | South Africa |
| 5 | PI 614679 01 | *P. vaginatum* | UGA | **+** | Bahamas |
| 6 | PI 299042 | *P. vaginatum* | UGA | **+** | Zimbabwe |
| 7 | PI 509018-3 | *P. vaginatum* | UGA | **+** | Argentina |
| 8 | K9 | *P. vaginatum* | UGA | **+** | Hawaii, USA |
| 9 | PI 647920 | *P. vaginatum* | UGA | **+** | Louisiana, USA |
| 10 | PI 647912 | *P. vaginatum* | UGA | **+** | Georgia, USA |
| 11 | PI 647918 | *P. vaginatum* | UGA | **+** | Florida, USA |
| 12 | PI 645598 | *P. vaginatum* | UGA | **+** | Texas, USA |
| 13 | PI 647916 | *P. vaginatum* | UGA | **+** | NK |
| 14 | Azul | *P. vaginatum* | UGA | **-** | NK |
| 15 | PI 614680 | *P. vaginatum* | UGA | **+** | Belize |
| 16 | PI 508737 | *P. vaginatum* | UGA | **+** | Argentina |
| 17 | PI647915 01 | *P. vaginatum* | UGA | **+** | Texas, USA |
| 18 | PI 647915 | *P. vaginatum* | UGA | **+** | Texas, USA |
| 19 | PI 509022 | *P. vaginatum* | UGA | **+** | Argentina |
| 20 | Cuba 223 | *P. vaginatum* | UGA | **+** | Hawaii, USA |
| 21 | Q36315 | *P. vaginatum* | UGA | **+** | Israel |
| 22 | PI 647908 01 | *P. vaginatum* | UGA | **+** | Georgia, USA |
| 23 | PI 377709 02 | *P. vaginatum* | UGA | **+** | South Africa |
| 24 | Kim 1 | *P. vaginatum* | UGA | **+** | Georgia, USA |
| 25 | PI 647901 | *P. vaginatum* | UGA | **+** | Guam |
| 26 | Hyb 5 | *P. vaginatum* | UGA | **+** | NA |
| 27 | Sea Dwarf | *P. vaginatum* | UGA | **-** | Florida, USA |
| 28 | KC 9 | *P. vaginatum* | UGA | **+** | Texas, USA |
| 29 | Spence | *P. distichum* (b) | UGA | **+** | Louisiana, USA |
| 30 | HI 10 | *P. vaginatum* (b) | UGA | **+** | Hawaii, USA |

1. – The information on *Paspalum* species except for Spence and HI 10 and their origin were obtained from Eudy et al., 2017. NK and NA indicates not known and not applicable, respectively.
2. – The information on *Paspalum* species were obtained from Spiekerman and Devos, 2020

+ Positive PCR result; - Negative PCR result
